# Supplementary material
Source: Research Square preprint supplement (doi:10.21203/rs.3.rs-8971620/v1)
Supplement: Supplementary file 1 [file 276632cfe5802998ace36579.docx]

Supplementary Table 1. TBSS group comparison

| FA Comparison | | | | |
| --- | --- | --- | --- | --- |
| Anatomical Regions | Max Peak | MNI Coordinates | | |
| x | y | z |
| Right external capsule | 8,55 | 33 | -13 | 8 |
| Left external capsule | 7,74 | -33 | 1 | 3 |
| Body of the corpus callosum | 4,91 | -17 | 11 | 33 |
| Right posterior corona radiata | 5,37 | 29 | -46 | 22 |
| Forceps major | 6,22 | -26 | -64 | 13 |
| Right anterior corona radiata | 5,79 | 18 | 28 | 22 |
| MD Comparison | | | | |
| Anatomical Regions | Max Peak | MNI Coordinates | | |
| x | y | z |
| Right superior longitudinal fasciculus | 7,78 | 35 | 24 | 33 |
| Right superior corona radiata | 6,33 | 26 | 9 | 24 |
| Splenium of the corpus callosum | 4,85 | 9 | -33 | 23 |
| Right inferior fronto-occipital fasciculus | 5,23 | 25 | 22 | 8 |
| Right dorsal cingulum subsection | 5,38 | 9 | -43 | 31 |
| Right superior thalamic radiation | 4,75 | 16 | -11 | 18 |
| Forceps minor | 4,94 | -118 | 28 | 22 |

Supplementary Table 2. Multiple linear regression of fractional anisotropy (FA) and mean diffusivity (MD) values against the volumes of the left and right ventricles and caudate nuclei.

|  | **Fractional anisotropy (FA) values** | | | | | | | |
| --- | --- | --- | --- | --- | --- | --- | --- | --- |
|  | **Left ventricle** | | | | **Right ventricle** | | | |
|  | β | *Std. Error* | *t value* | *p value* | β | *Std. Error* | *t value* | *p value* |
| **Body of Corpus Callosum** | 12 | 8 | 1.448 | 0.163 | -0.017 | 0.008 | -2.152 | 0.044* |
| **Left Superior Longitudinal Fasciculus** | 0.006 | 0.007 | 0.841 | 0.411 | -0.012 | 0.007 | -1.720 | 0.102 |
| **Left Superior Corona Radiada** | -0.003 | 0.007 | -0.375 | 0.712 | -0.001 | 0.007 | -0.113 | 0.911 |
|  | **Mean Diffusivity (MD) values** | | | | | | | |
|  | **Left ventricle** | | | | **Right ventricle** | | | |
|  | β | *Std. Error* | *t value* | *p value* | β | *Std. Error* | *t value* | *p value* |
| **Body of Corpus Callosum** | -8.374e-05 | 7.772e-05 | -1.078 | 0.295 | 1.413e-04 | 7.747e-05 | 1.824 | 0.084 |
| **Right Superior Longitudinal Fasciculus** | -9.050e-05 | 8.785e-05 | -1.026 | 0.318 | 1.424e-04 | 8.757e-05 | 1.626 | 0.120 |
| **Left Superior Corona Radiada** | -8.311e-05 | 1.011e-04 | -0.822 | 0.421 | 1.352e-04 | 1.008e-04 | 1.341 | 0.196 |
|  | **Fractional anisotropy (FA) values** | | | | | | | |
|  | **Left caudate** | | | | **Right caudate** | | | |
|  | β | *Std. Error* | *t value* | *p value* | β | *Std. Error* | *t value* | *p value* |
| **Body of Corpus Callosum** | - 0.152 | 0.278 | -0.548 | 0.590 | -0.260 | 0.264 | 0.985 | 0.337 |
| **Left Superior Longitudinal Fasciculus** | 0.982 | 0.242 | 0.406 | 0.69 | -0.001 | 0.230 | -0.004 | 0.997 |
| **Left Superior Corona Radiada** | 0.045 | 0.203 | 0.221 | 0.827 | 0.042 | 0.193 | 0.216 | 0.831 |
|  | **Mean Diffusivity (MD) values** | | | | | | | |
|  | **Left caudate** | | | | **Right caudate** | | | |
|  | β | *Std. Error* | *t value* | *p value* | β | *Std. Error* | *t value* | *p value* |
| **Body of Corpus Callosum** | -0.001 | 0.003 | -0.136 | 0.893 | -0.001 | 0.003 | -0.201 | 0.843 |
| **Right Superior Longitudinal Fasciculus** | -0.001 | 0.003 | -0.127 | 0.901 | -0.001 | 0.003 | -0.282 | 0.781 |
| **Left Superior Corona Radiada** | 0.002 | 0.001 | 0.404 | 0.691 | 0.002 | 0.003 | -0.764 | 0.454 |
